# Supplementary material for: Integrated Bioinformatics-Based Subtractive Genomics Approach to Decipher the Therapeutic Drug Target and Its Possible Intervention against Brucellosis
Source: MDPI journal article supplement (doi:10.3390/bioengineering9110633), 2022-11-01
Supplement: s1 [file s1]

# Integrated Bioinformatics Based Subtractive Genomics Approach to Decipher the Therapeutic Drug Target and its Possible Intervention Against Brucellosis

Kanwal Khan <sup>1</sup>, Munirah Sulaiman Othman Alhar<sup>2</sup>, Muhammad Naseer Abbas <sup>3</sup>, Syed Qamar Abbas<sup>4</sup>, Mohsin Kazi<sup>5</sup>, Saeed Ahmad Khan <sup>6,7</sup>, Abdul Sadiq<sup>8</sup>, Syed Shams ul Hassan<sup>9,10\*</sup>, Simona Bungau<sup>11\*</sup>, Khurshid Jalal<sup>12\*</sup>

<sup>1</sup> Dr. Panjwani Center for Molecular Medicine and Drug Research, International Center for Chemical and Biological Sciences, University of Karachi, Pakistan

<sup>2</sup> Department of Chemistry, College of Science, University of Ha'il, Ha'il 81451, Saudi Arabia

<sup>3</sup> Department of Pharmacy, Kohat University of Science and Technology, Kohat KP Pakistan 26000

<sup>4</sup> Department of Pharmacy, Sarhad University of science and technology, Peshawar

<sup>5</sup> Department of Pharmaceutics, College of Pharmacy, King Saud University, P.O. Box 2457, Riyadh 11451, Saudi Arabia

<sup>6</sup> Department of Pharmacy, Kohat University of Science and Technology, 26000 Kohat, Pakistan

<sup>7</sup> Division of Molecular Pharmaceutics and Drug Delivery, The University of Texas at Austin, 2409 University Ave., Austin, Texas, USA

<sup>8</sup> Department of Pharmacy, Faculty of Biological Sciences, University of Malakand, Chakdara, 18000 Dir (L), KP, Pakistan

<sup>9</sup> Shanghai Key Laboratory for Molecular Engineering of Chiral Drugs, School of Pharmacy, Shanghai Jiao Tong University, Shanghai 200240, China

<sup>10</sup> Department of Natural Product Chemistry, School of Pharmacy, Shanghai Jiao Tong University, Shanghai 200240, China

<sup>11</sup> Department of Pharmacy, Faculty of Medicine and Pharmacy, University of Oradea, 410028 Oradea, Romania

<sup>12</sup> HEJ Research Institute of Chemistry International Center for Chemical and Biological Sciences, University of Karachi, Pakistan

\* Correspondence: khurshid@iccs.edu (K.J); Shams1327@yahoo.com (S.S.U.H), Simonabungau@gmail.com (S.B)

Supplementary Table S1: Common Metabolic Pathways of *Brucella suis* and Human host

| S. No | Common Metabolic Pathways               | Pathways ID | Number of Proteins |
|-------|-----------------------------------------|-------------|--------------------|
| 1     | Glycolysis                              | Bms00010    | 33                 |
| 2     | Citric acid cycle                       | Bms00020    | 24                 |
| 3     | Pentose phosphate pathway               | Bms00030    | 18                 |
| 4     | Pentose and glucuronate interconversion | Bms00040    | 12                 |
| 5     | Fructose and mannose metabolism         | Bms00051    | 17                 |
| 6     | Galactose metabolism                    | Bms00052    | 8                  |
| 7     | Ascorbate and ascorate metabolism       | Bms00053    | 5                  |
| 8     | Starch and sucrose metabolism           | Bms00500    | 6                  |
| 9     | Amino sugar and nucleotide metabolism   | Bms00520    | 31                 |
| 10    | Pyruvate metabolism                     | Bms00620    | 47                 |
| 11    | Glyoxylate and dicarboxylate metabolism | Bms00630    | 36                 |
| 12    | Propanoate metabolism                   | Bms00640    | 30                 |
| 13    | Butanoate metabolism                    | Bms00650    | 24                 |
| 14    | Inositol phosphate metabolism           | Bms00562    | 8                  |
| 15    | Oxidative phosphorylation               | Bms00190    | 52                 |
| 16    | Nitrogen metabolism                     | Bms00910    | 18                 |
| 17    | Sulphur metabolism                      | Bms00920    | 18                 |
| 18    | Fatty acid biosynthesis                 | Bms00061    | 23                 |
| 19    | Fatty acid degradation                  | Bms00071    | 21                 |
| 20    | Fatty acid elongation                   | Bms00070    | 1                  |
| 21    | Synthesis and degradation ketone bodies | Bms00072    | 4                  |

|    |                                                    |           |    |
|----|----------------------------------------------------|-----------|----|
| 22 | Glycerolipid metabolism                            | Bms00561  | 9  |
| 23 | Glycerophospholipid metabolism                     | Bms00564  | 13 |
| 24 | Alpha-linolenic acid metabolism                    | Bms00592  | 1  |
| 25 | Biosynthesis of unsaturated fatty acid             | Bms01040  | 3  |
| 26 | Purine metabolism                                  | Bms00230  | 53 |
| 27 | Pyrimidine metabolism                              | Bms00240  | 27 |
| 28 | Alanine aspartate and glutamate metabolism         | Bms00250  | 27 |
| 29 | Glycine serine and threonine metabolism            | Bms00260  | 32 |
| 30 | Cysteine and methionine metabolism                 | Bms00270  | 23 |
| 31 | Valine leucine and isoleucine degradation          | Bms00280  | 31 |
| 32 | Valine leucine and isoleucine biosynthesis         | Bms00290  | 13 |
| 33 | Lysine degradation                                 | Bms00310  | 19 |
| 34 | Arginine biosynthesis                              | Bms00220  | 22 |
| 35 | Arginine and proline metabolism                    | Bms00330  | 25 |
| 36 | Histidine metabolism                               | Bms00340  | 19 |
| 37 | Tyrosine metabolism                                | Bms00350  | 16 |
| 38 | Phenyl alanine metabolism                          | Bms00360  | 14 |
| 39 | Tryptophane metabolism                             | Bms00380  | 17 |
| 40 | Phenylalanine tyrosine and tryptophan biosynthesis | Bms00400  | 20 |
| 41 | Beta alanine metabolism                            | Bms000410 | 13 |
| 42 | Taurine and hypo taurine metabolism                | Bms00430  | 2  |
| 43 | Phosphonate and phophenate metabolism              | Bms00440  | 2  |
| 44 | Selenocompound metabolism                          | Bms00450  | 8  |

|    |                                                       |          |    |
|----|-------------------------------------------------------|----------|----|
| 45 | D-glutamine and D-glutamate metabolism                | Bms00471 | 5  |
| 46 | D-arginine and D-ornithine metabolism                 | Bms00472 | 1  |
| 47 | Glutathione metabolism                                | Bms00480 | 18 |
| 48 | Thymine metabolism                                    | Bms00730 | 12 |
| 49 | Riboflavin metabolism                                 | Bms00740 | 7  |
| 50 | Vitamins B6 metabolism                                | Bms00750 | 6  |
| 51 | Nicotinate and nicotinamide metabolism                | Bms00760 | 15 |
| 52 | Pantothenate and CoA biosynthesis                     | Bms00770 | 20 |
| 53 | Biotin metabolism                                     | Bms00780 | 18 |
| 54 | Lipoic acid metabolism                                | Bms00785 | 2  |
| 55 | Folate biosynthesis                                   | Bms00790 | 21 |
| 56 | One-carbon pool by folate                             | Bms00670 | 11 |
| 57 | Porphyrin and chlorophyll metabolism                  | Bms00860 | 41 |
| 58 | Ubiquinone and another terpenoid-quinone biosynthesis | Bms00130 | 9  |
| 59 | Terpenoid backbone biosynthesis                       | Bms00900 | 11 |
| 60 | RNA polymerase                                        | Bms03020 | 4  |
| 61 | Amino-acyl tRNA biosynthesis                          | Bms00970 | 26 |
| 62 | Protein export                                        | Bms03060 | 16 |
| 63 | Sulphur relay system                                  | Bms04122 | 10 |
| 64 | RNA degradation                                       | Bms03018 | 14 |
| 65 | DNA replication                                       | Bms03030 | 9  |
| 66 | Base excision repair                                  | Bms03410 | 12 |
| 67 | Nucleotide excision repair                            | Bms03420 | 7  |

|    |                          |          |     |
|----|--------------------------|----------|-----|
| 68 | Mismatch repair          | Bms03430 | 17  |
| 69 | Homologous recombination | Bms03440 | 21  |
| 70 | ABC transporter          | Bms02010 | 188 |

| <b>Supplementary Table S2: 42 shortlisted drug like targets against B. suis</b> |                |                                                                     |                                 |
|---------------------------------------------------------------------------------|----------------|---------------------------------------------------------------------|---------------------------------|
| <b>1</b>                                                                        | WP_002963761.1 | response regulator transcription factor                             | Cytoplasmic<br>9.97             |
| <b>2</b>                                                                        | WP_002964109.1 | D-alanyl-D-alanine carboxypeptidase                                 | Cytoplasmic<br>Membrane<br>9.97 |
| <b>3</b>                                                                        | WP_002964699.1 | response regulator transcription factor                             | Cytoplasmic<br>9.97             |
| <b>4</b>                                                                        | WP_002965100.1 | D-alanyl-D-alanine carboxypeptidase                                 | Cytoplasmic<br>Membrane<br>9.97 |
| <b>5</b>                                                                        | WP_002965156.1 | response regulator transcription factor                             | Cytoplasmic<br>9.97             |
| <b>6</b>                                                                        | WP_002965207.1 | phosphate regulon transcriptional regulator<br>PhoB                 | Cytoplasmic<br>9.97             |
| <b>7</b>                                                                        | WP_002965384.1 | global response regulator transcription factor<br>RegA              | Cytoplasmic<br>9.97             |
| <b>8</b>                                                                        | WP_002966022.1 | response regulator                                                  | Cytoplasmic<br>9.97             |
| <b>9</b>                                                                        | WP_002966153.1 | response regulator transcription factor                             | Cytoplasmic<br>9.97             |
| <b>10</b>                                                                       | WP_002966190.1 | response regulator transcription factor                             | Cytoplasmic<br>9.97             |
| <b>11</b>                                                                       | WP_002966355.1 | sensor histidine kinase N-terminal domain-<br>containing protein    | Cytoplasmic<br>Membrane<br>7.88 |
| <b>12</b>                                                                       | WP_002966460.1 | HTH-type quorum sensing-dependent<br>transcriptional regulator VjbR | Unknown                         |
| <b>13</b>                                                                       | WP_002966538.1 | two-component sensor histidine kinase                               | Cytoplasmic<br>Membrane         |

|           |                |                                                                         |                                  |
|-----------|----------------|-------------------------------------------------------------------------|----------------------------------|
|           |                |                                                                         | 10.00                            |
| <b>14</b> | WP_002966632.1 | D-xylose ABC transporter substrate-binding protein                      | Periplasmic<br>9.76              |
| <b>15</b> | WP_002968915.1 | ABC transporter substrate-binding protein                               | Periplasmic<br>9.76              |
| <b>16</b> | WP_002970053.1 | PAS domain-containing sensor histidine kinase                           | Cytoplasmic<br>Membrane<br>10.00 |
| <b>17</b> | WP_002971389.1 | response regulator transcription factor                                 | Cytoplasmic<br>9.97              |
| <b>18</b> | WP_002971443.1 | PAS domain-containing hybrid sensor histidine kinase/response regulator | Cytoplasmic<br>Membrane<br>9.99  |
| <b>19</b> | WP_002971701.1 | LuxR family transcriptional regulator                                   | Cytoplasmic<br>9.26              |
| <b>20</b> | WP_004681910.1 | PleD family two-component system response regulator                     | Cytoplasmic<br>9.97              |
| <b>21</b> | WP_004681922.1 | IclR family transcriptional regulator                                   | Cytoplasmic<br>9.97              |
| <b>22</b> | WP_004684524.1 | LacI family DNA-binding transcriptional regulator                       | Cytoplasmic<br>9.97              |
| <b>23</b> | WP_004684628.1 | LysR family transcriptional regulator                                   | Cytoplasmic<br>9.97              |
| <b>24</b> | WP_004684782.1 | ABC transporter substrate-binding protein                               | Periplasmic<br>9.76              |
| <b>25</b> | WP_004686048.1 | sn-glycerol-3-phosphate ABC transporter substrate-binding protein UgpB  | Periplasmic<br>10.00             |
| <b>26</b> | WP_004687154.1 | nickel ABC transporter, nickel/metallophore periplasmic binding protein | Periplasmic<br>10.00             |

|    |                |                                                         |                                 |
|----|----------------|---------------------------------------------------------|---------------------------------|
| 27 | WP_004689042.1 | amino acid ABC transporter substrate-binding protein    | Periplasmic<br>9.44             |
| 28 | WP_004690331.1 | D-ribose ABC transporter substrate-binding protein      | Periplasmic<br>9.76             |
| 29 | WP_004690544.1 | two-component sensor histidine kinase                   | Cytoplasmic<br>Membrane<br>7.88 |
| 30 | WP_004690676.1 | response regulator transcription factor                 | Cytoplasmic<br>9.97             |
| 31 | WP_004690853.1 | D-alanyl-D-alanine carboxypeptidase                     | Cytoplasmic<br>Membrane<br>9.97 |
| 32 | WP_004690877.1 | sigma-54-dependent Fis family transcriptional regulator | Cytoplasmic<br>9.97             |
| 33 | WP_004691511.1 | isocitrate lyase                                        | Cytoplasmic<br>9.97             |
| 34 | WP_006133828.1 | ABC transporter substrate-binding protein               | Periplasmic<br>10.00            |
| 35 | WP_006189967.1 | LacI family DNA-binding transcriptional regulator       | Cytoplasmic<br>9.97             |
| 36 | WP_006190489.1 | D-alanyl-D-alanine carboxypeptidase                     | Cytoplasmic<br>Membrane 9.82    |
| 37 | WP_006191518.1 | IclR family transcriptional regulator                   | Cytoplasmic<br>9.97             |
| 38 | WP_006192075.1 | Fe(3+) ABC transporter substrate-binding protein        | Periplasmic<br>9.76             |
| 39 | WP_006192133.1 | ABC transporter substrate-binding protein               | Periplasmic<br>10.00            |
| 40 | WP_006278874.1 | peptide ABC transporter substrate-binding protein       | Periplasmic<br>10.00            |



|           |                |                                                                 |                         |
|-----------|----------------|-----------------------------------------------------------------|-------------------------|
| <b>41</b> | WP_011068960.1 | multidrug efflux RND transporter outer<br>membrane subunit BepC | Outer Membrane<br>10.00 |
| <b>42</b> | WP_002966536.1 | response regulator                                              | Cytoplasmic<br>9.97     |
